# Supplementary material for: Decreased cerebrospinal fluid kynurenic acid in epileptic spasms: A biomarker of response to corticosteroids
Source: PubMed Central journal article supplement (PMC9515432; doi:10.1016/j.ebiom.2022.104280), 2022-09-26

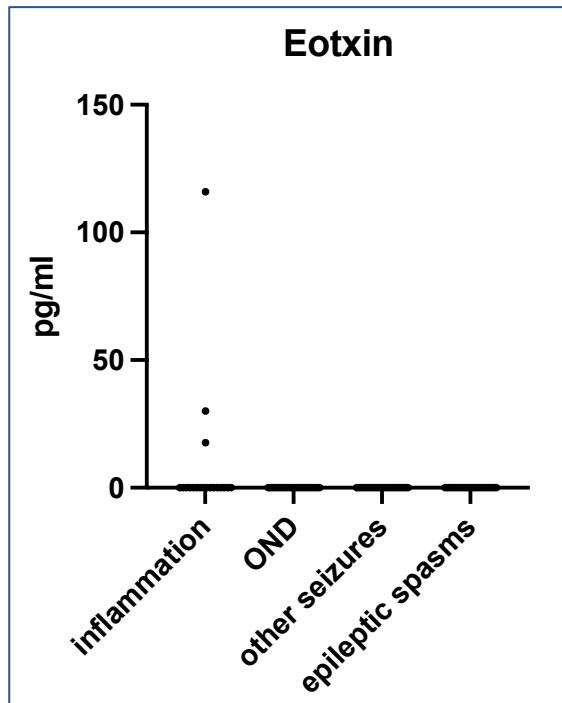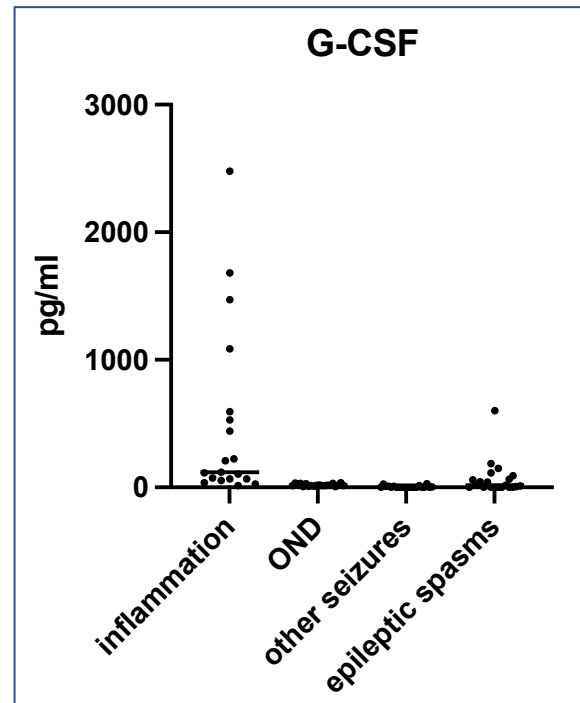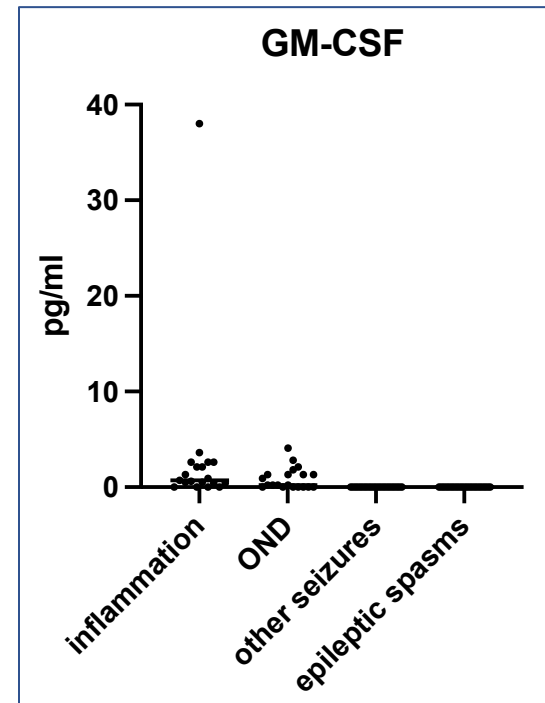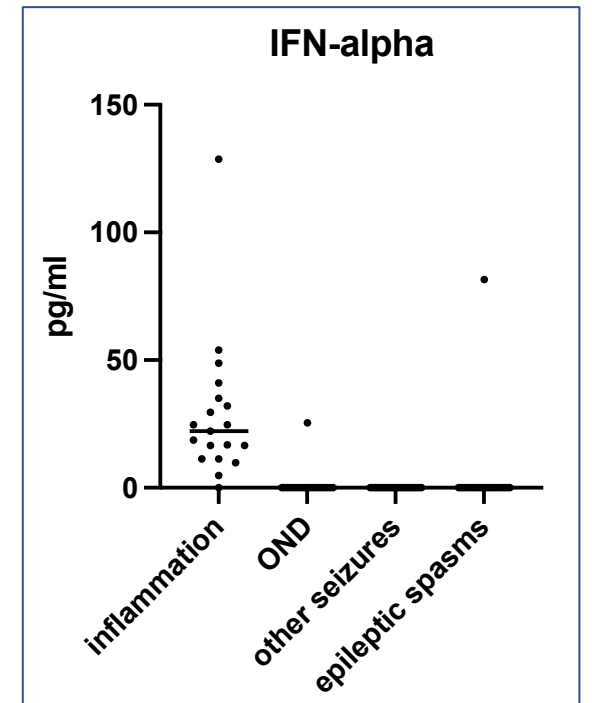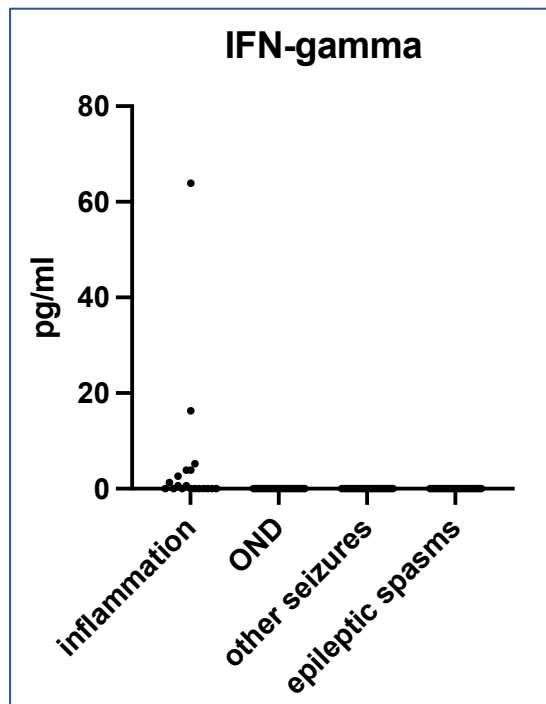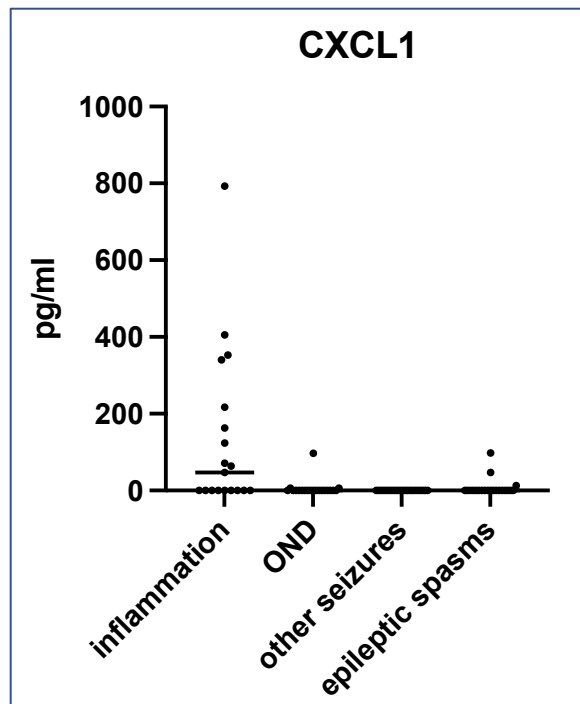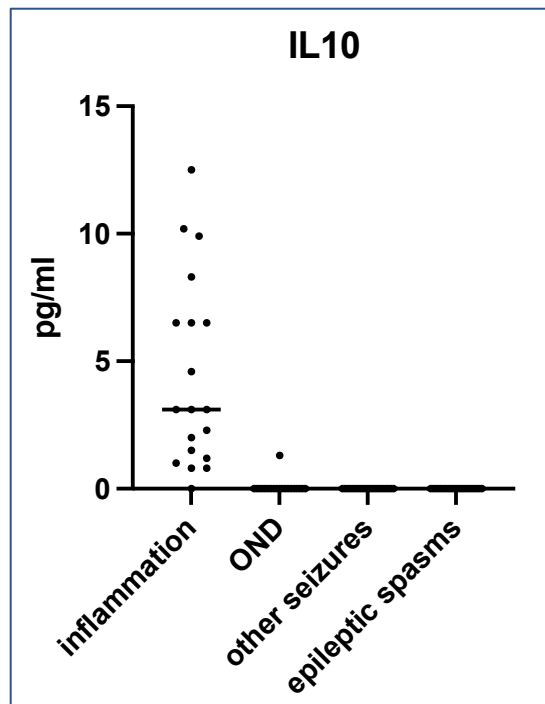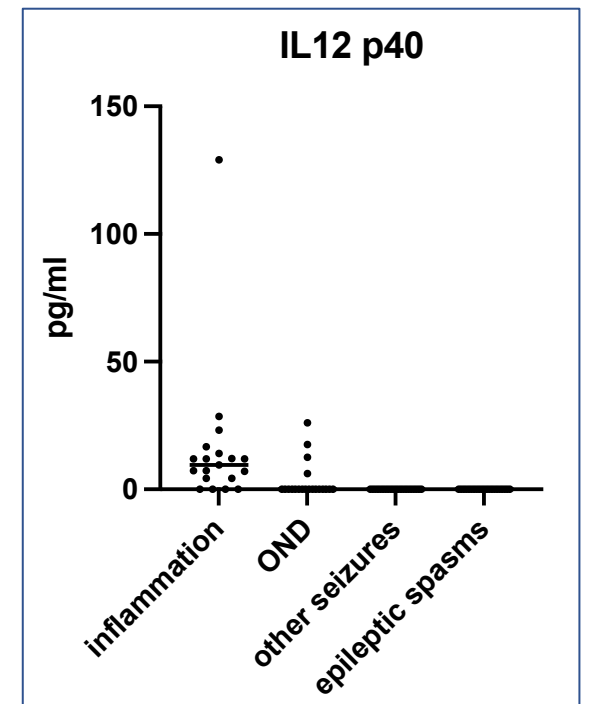



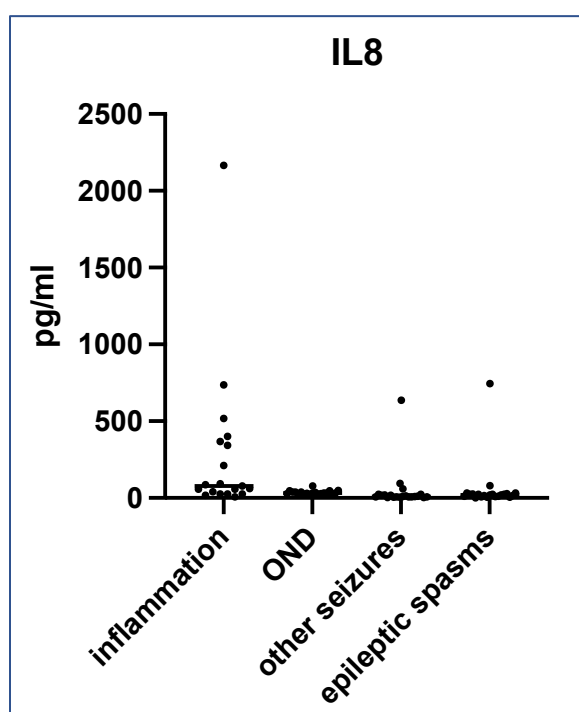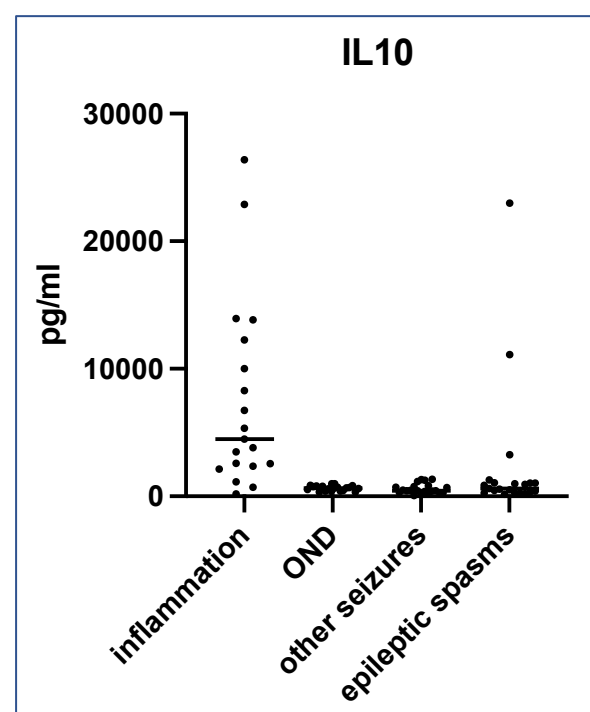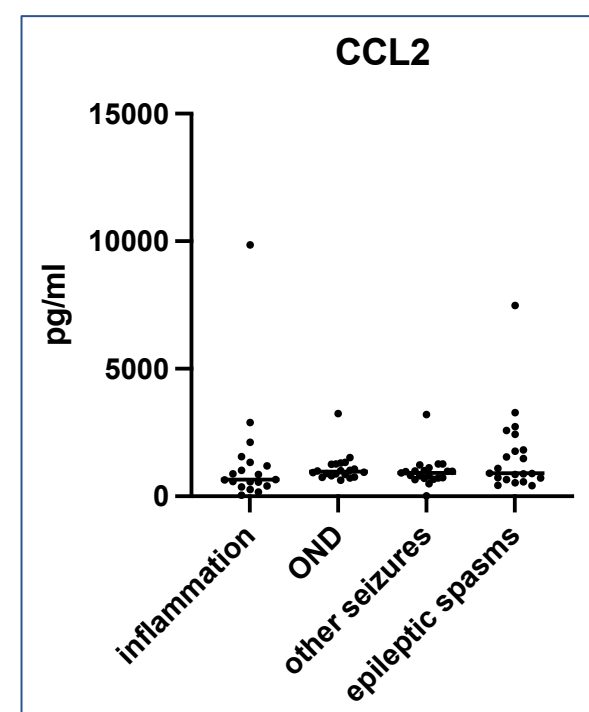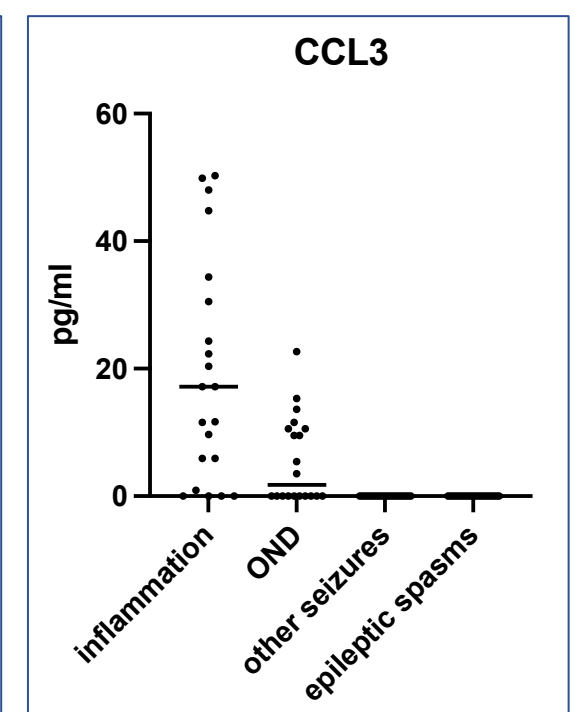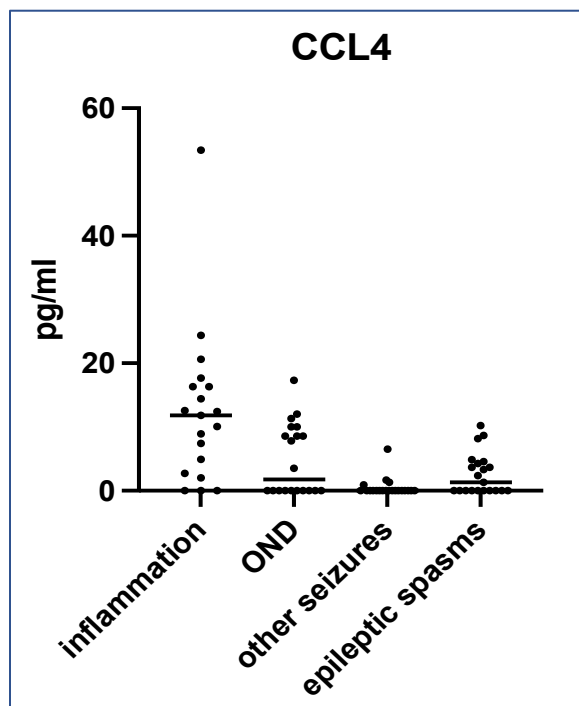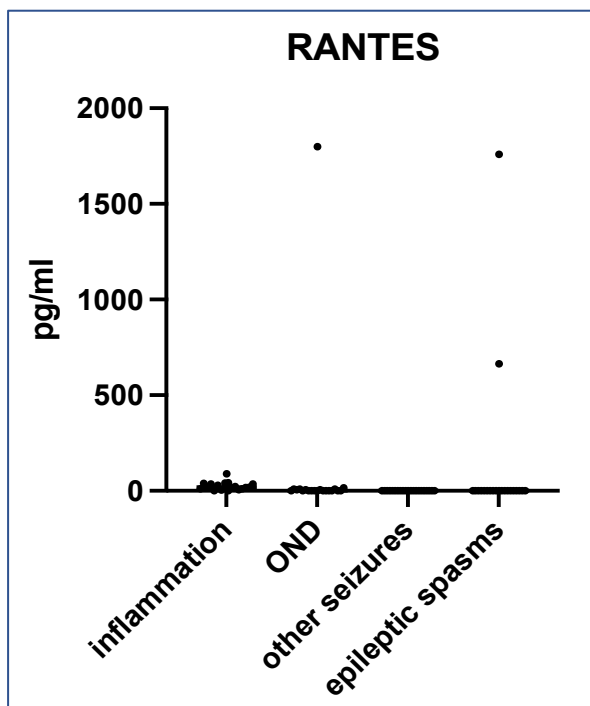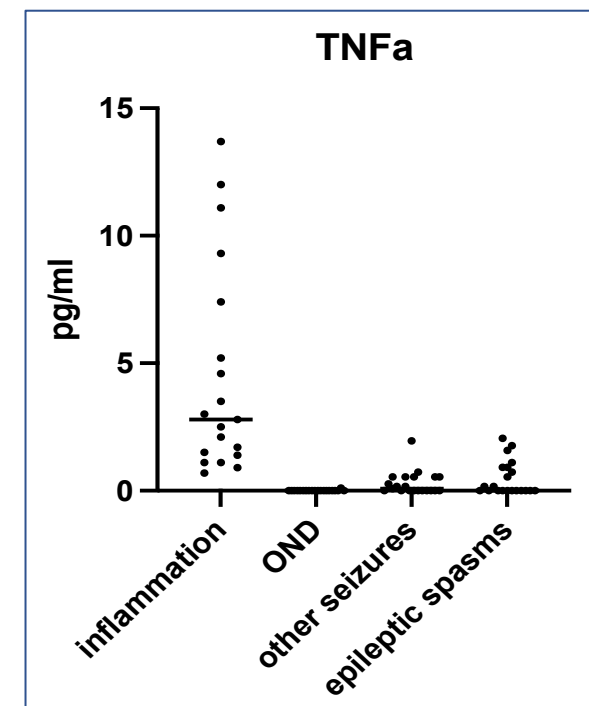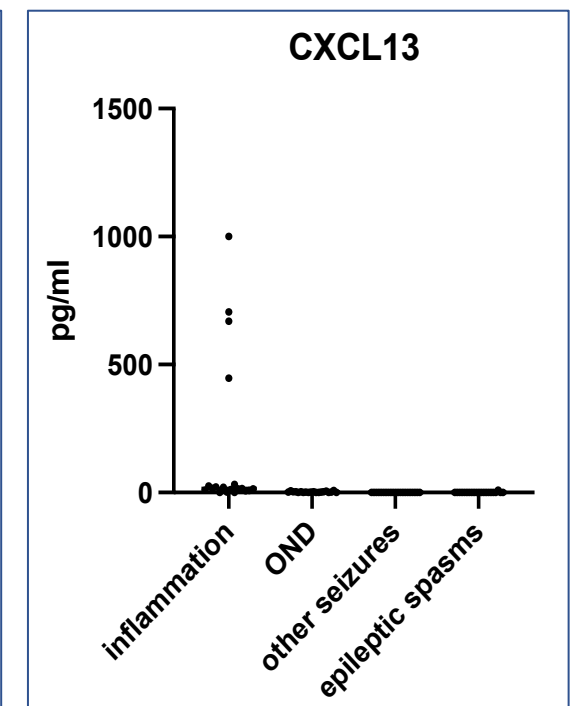

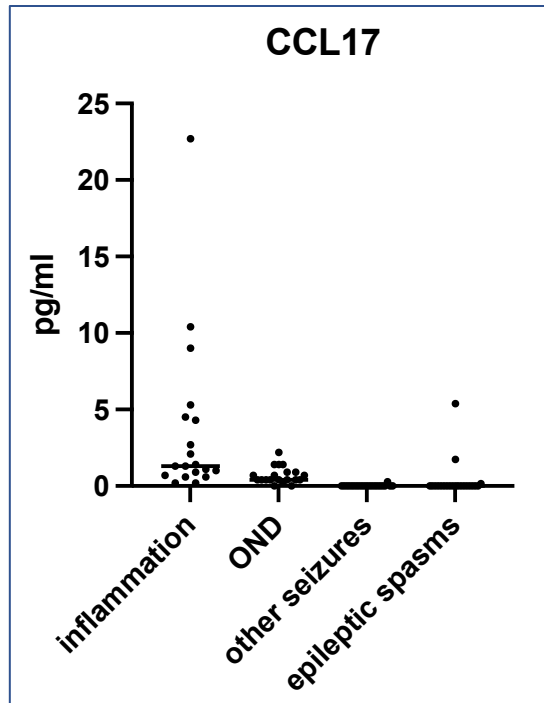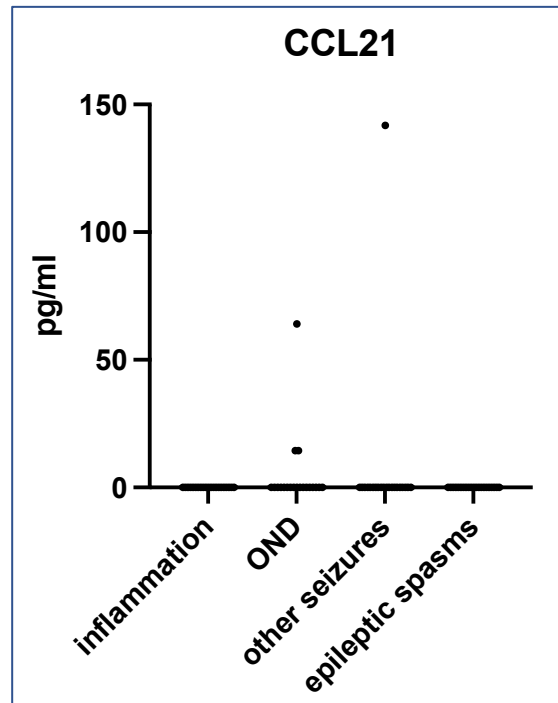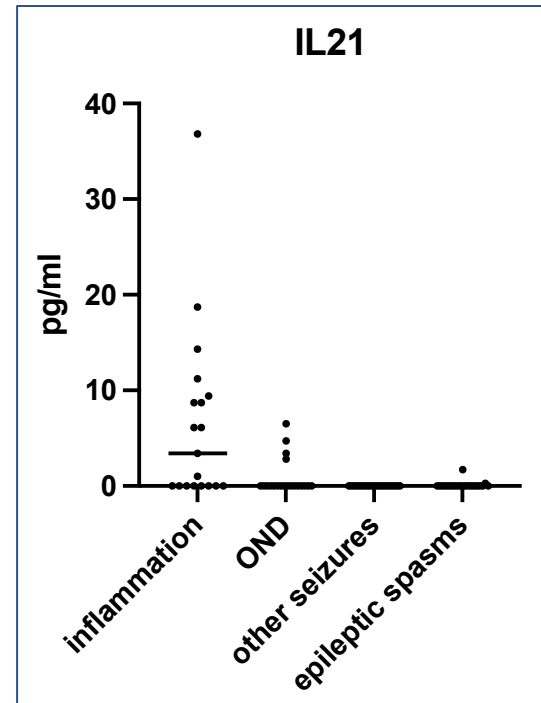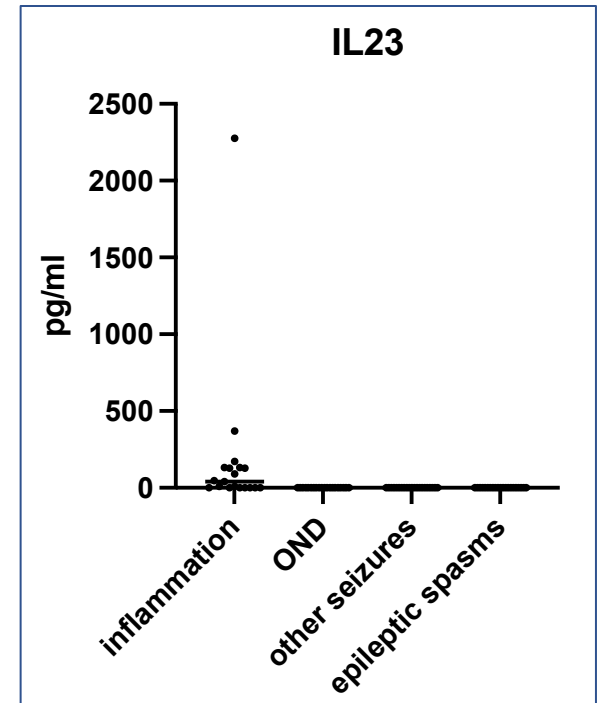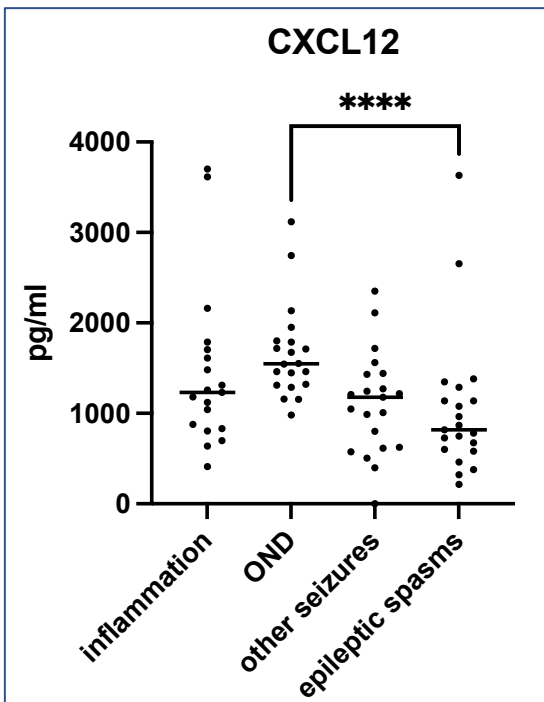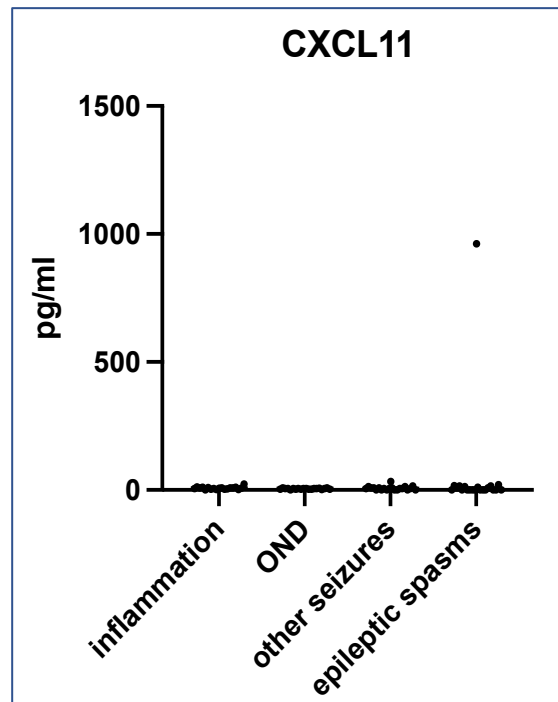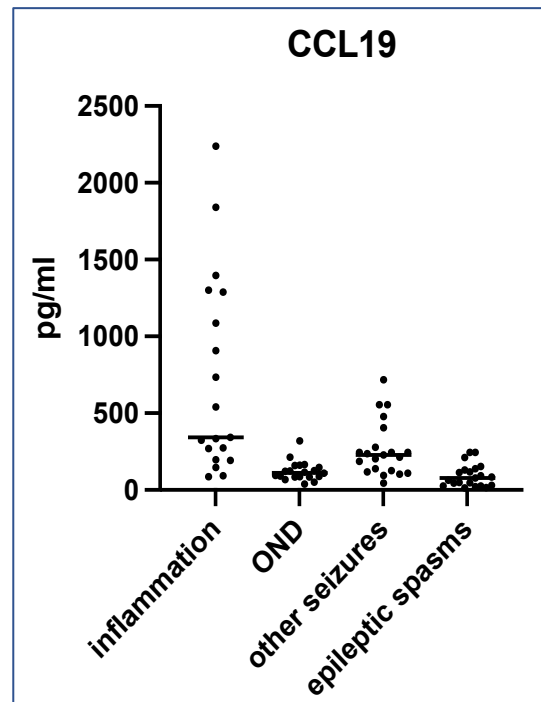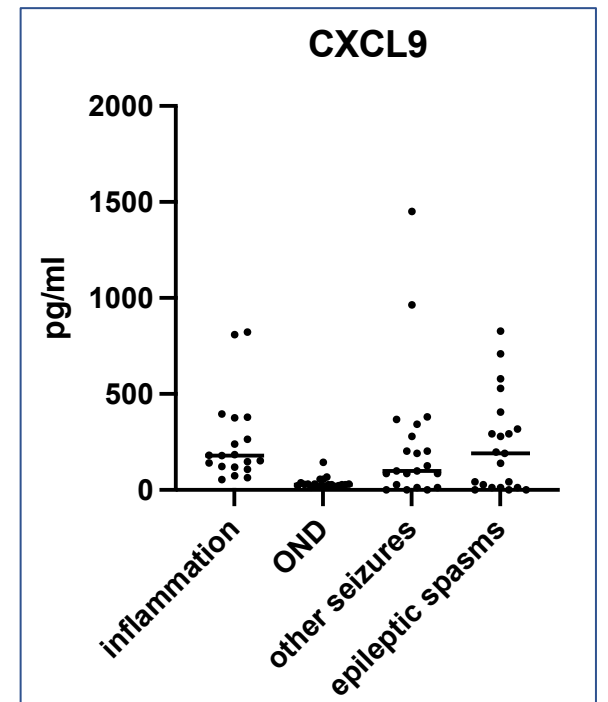

Supplement: mmc3.pdf [file mmc3.pdf]
