# Supplementary material for: Decreased cerebrospinal fluid kynurenic acid in epileptic spasms: A biomarker of response to corticosteroids
Source: PubMed Central journal article supplement (PMC9515432; doi:10.1016/j.ebiom.2022.104280), 2022-09-26

### KYNA <1yr

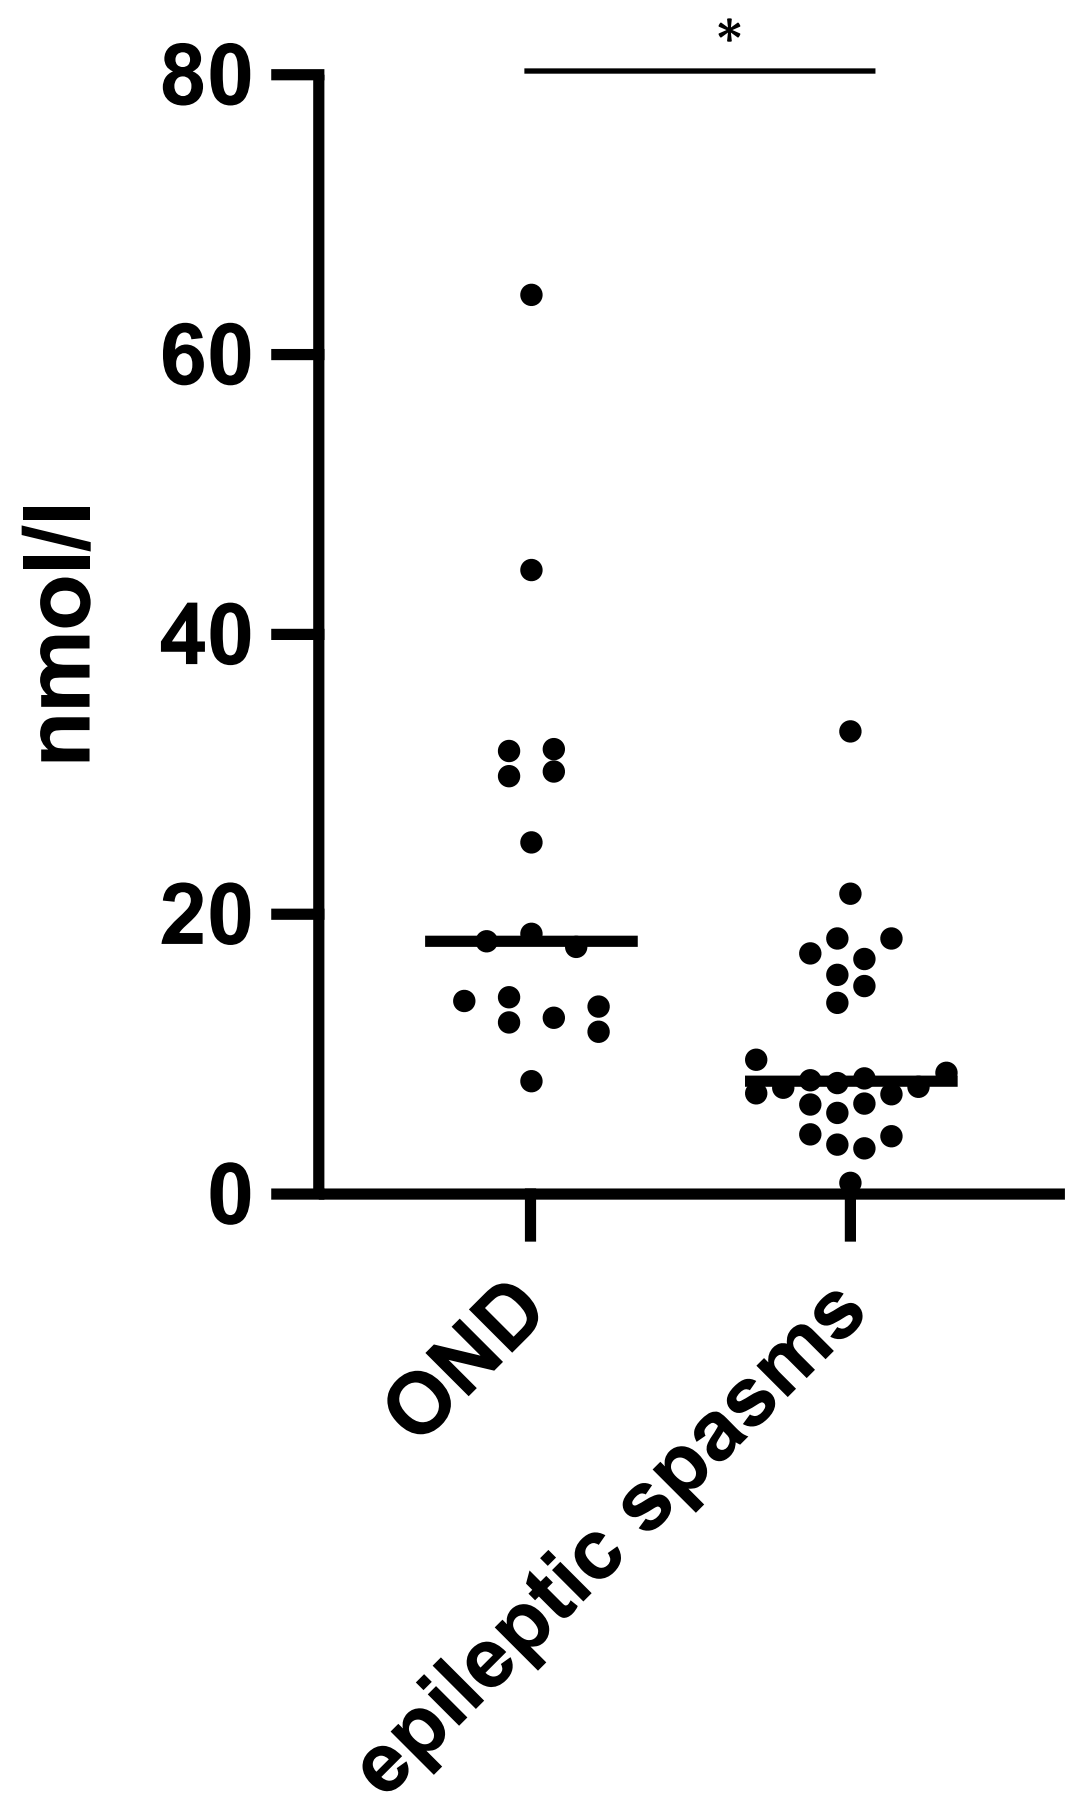

### KYNA/KYN <1yr

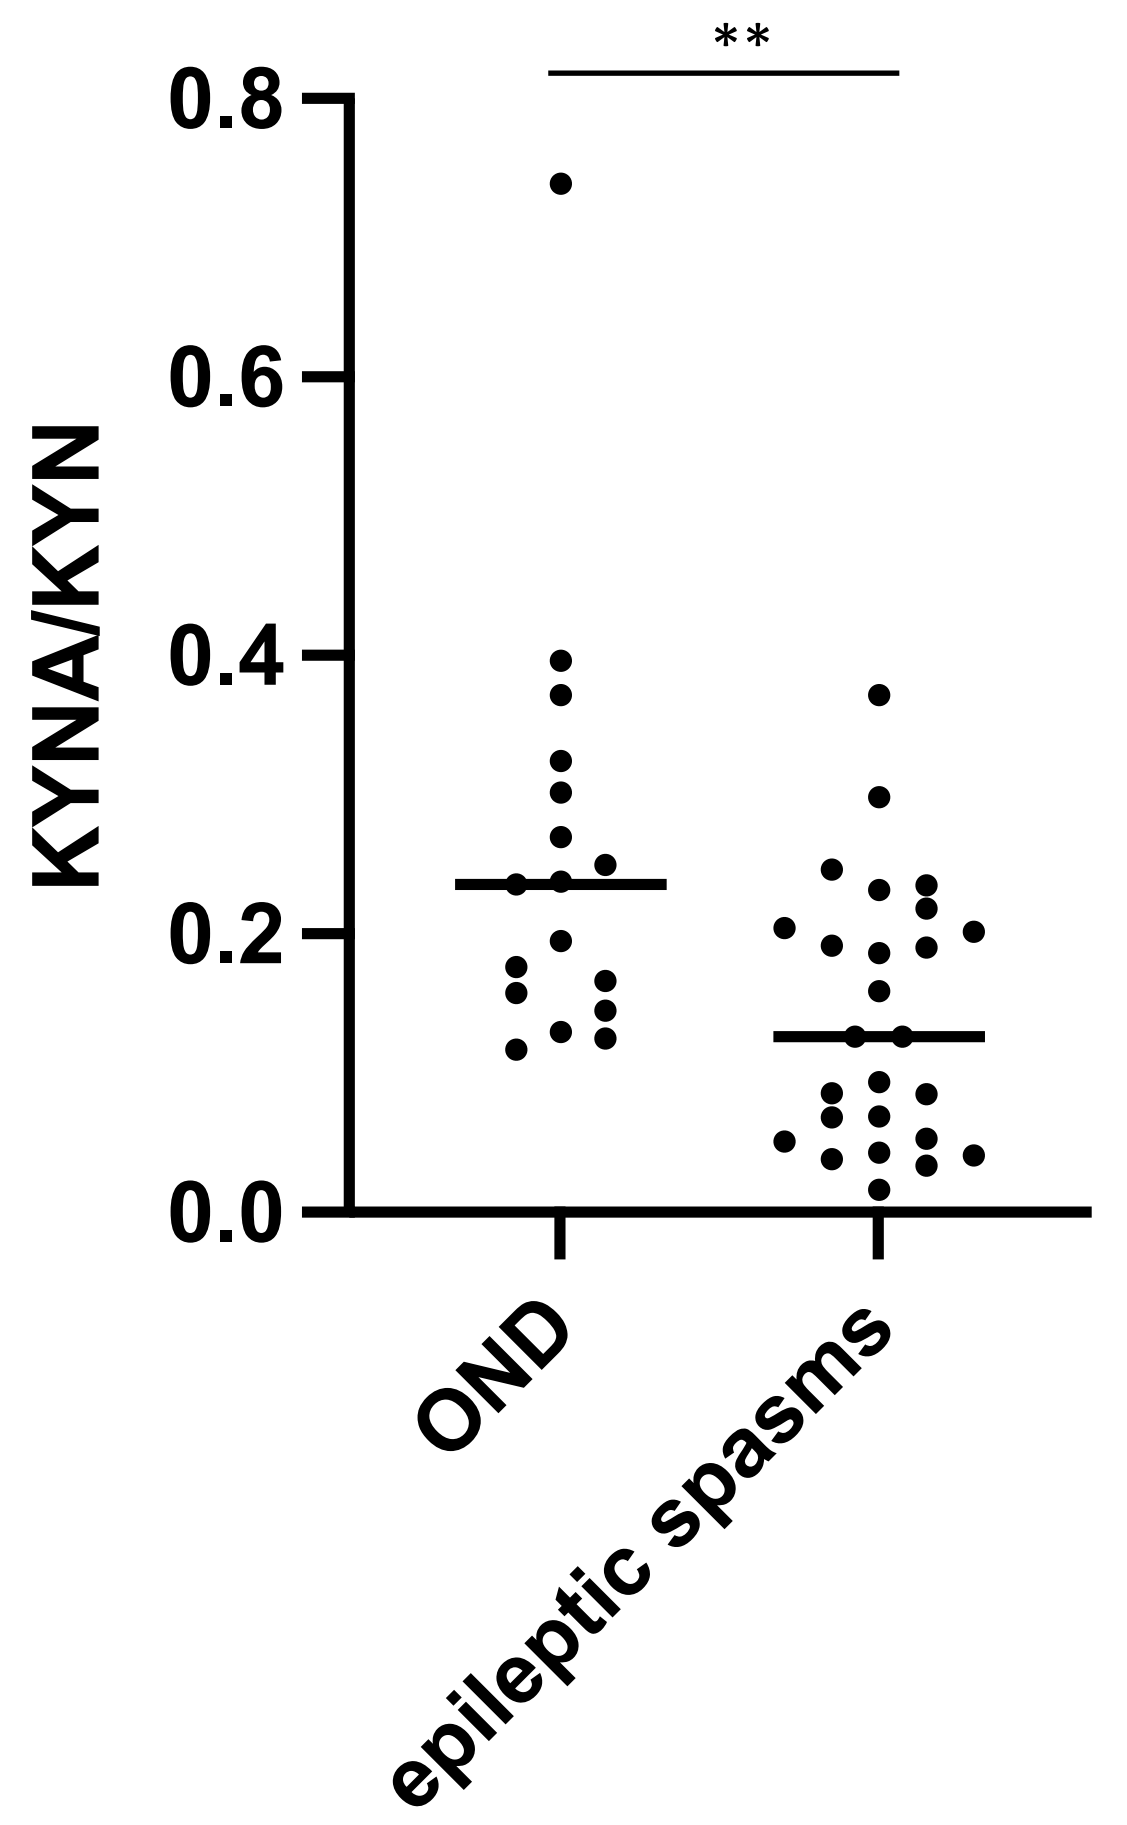

Supplement: mmc1.pdf [file mmc1.pdf]
